# Supplementary material for: Comparative Analysis of the Effects of Hydroxysafflor Yellow A and Anhydrosafflor Yellow B in Safflower Series of Herb Pairs Using Prep-HPLC and a Selective Knock-Out Approach
Source: PubMed Central journal article supplement (PMC6274300; doi:10.3390/molecules21111480), 2016-11-06
Supplement: molecules-21-01480-s001.pdf [file molecules-21-01480-s001.pdf]

# Supplementary Materials: Comparative Analysis of Effects of Hydroxysafflor Yellow A and Anhydrosafflor Yellow B in Safflower Series of Herb Pairs by Prep-HPLC and a Selective Knock-Out Approach

Cheng Qu, Lin-Yan Wang, Wen-Tao Jin, Yu-Ping Tang, Yi Jin, Xu-Qin Shi, Li-Li Shang, Er-Xin Shang and Jin-Ao Duan

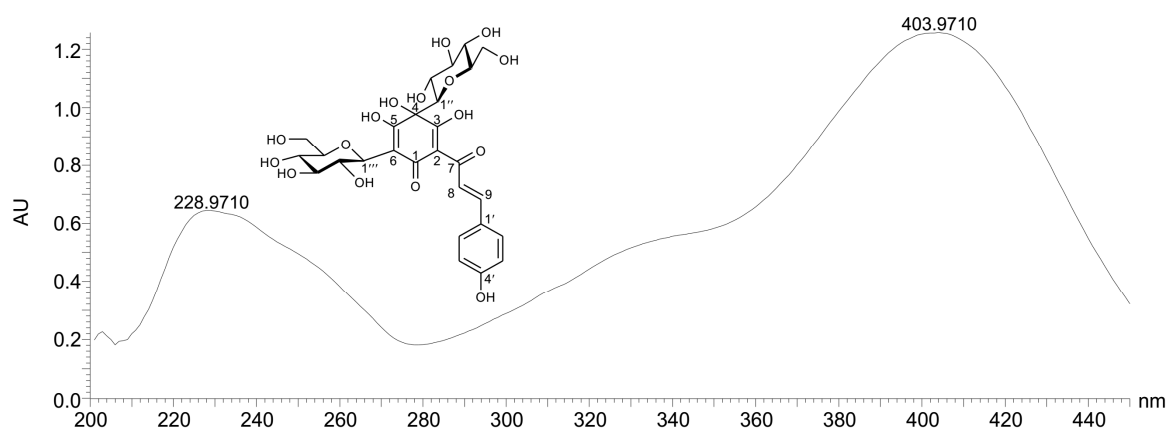

Figure S1. UV spectrum of HSYA.

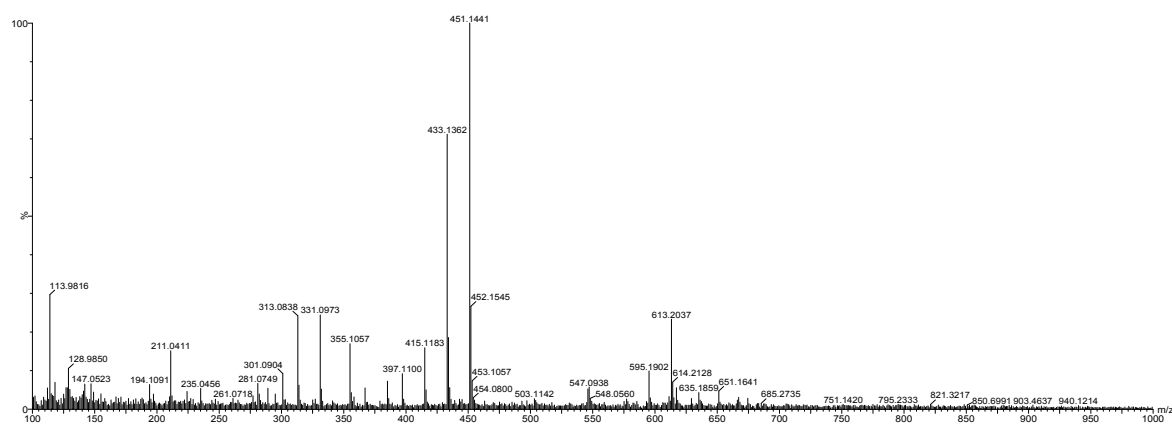

Figure S2. ESI<sup>+</sup> spectrum of HSYA.

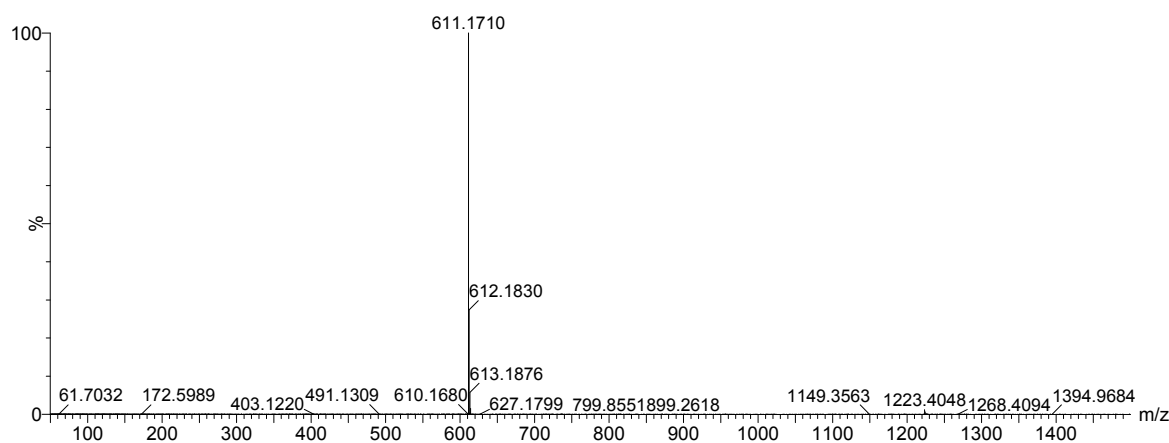

Figure S3. ESI<sup>-</sup> spectrum of HSYA.

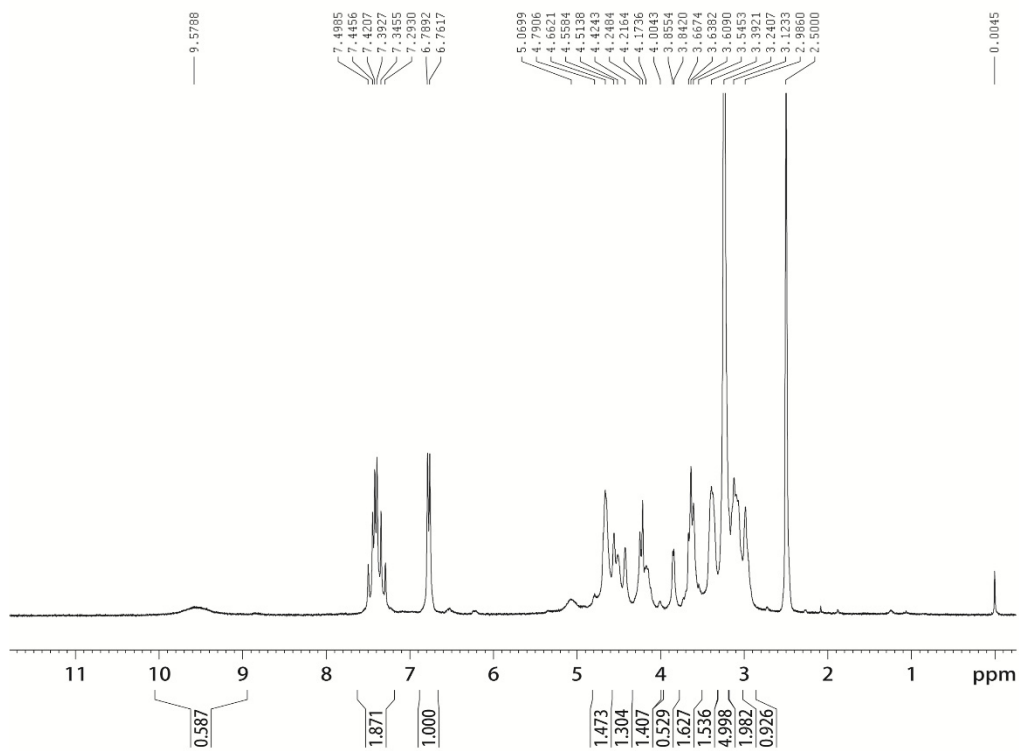

Figure S4.  $^1\text{H}$ -NMR spectrum of HSYA in  $\text{DMSO-}d_6$  (300 MHz).

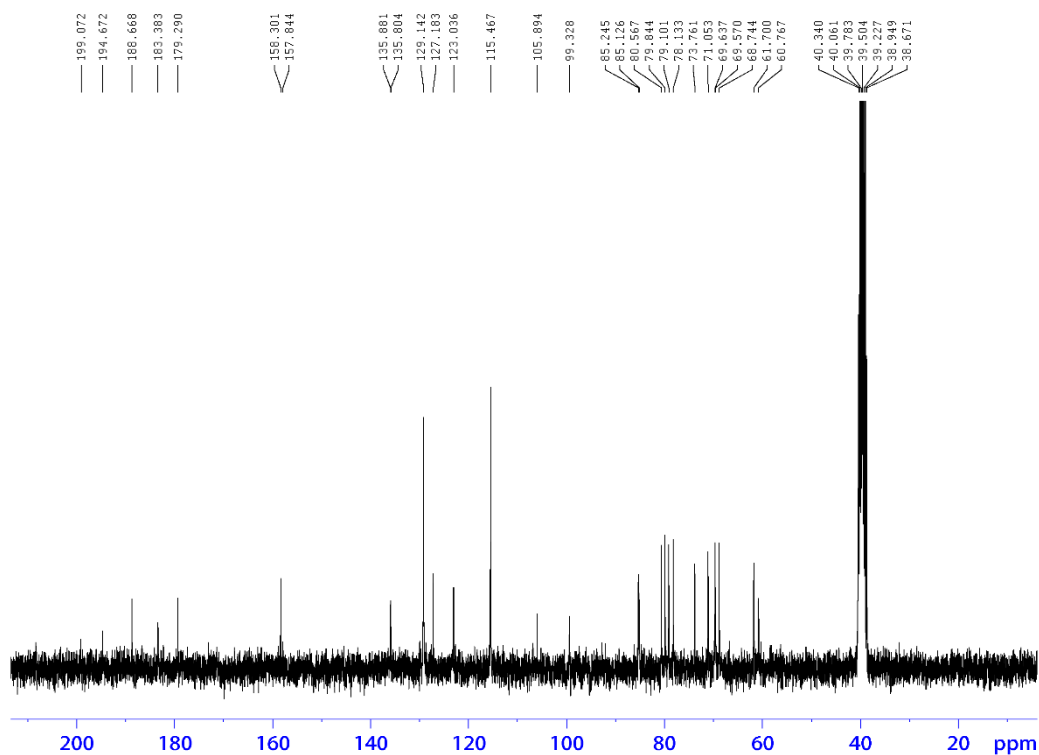

Figure S5.  $^{13}\text{C}$ -NMR spectrum of HSYA in  $\text{DMSO-}d_6$  (75 MHz).

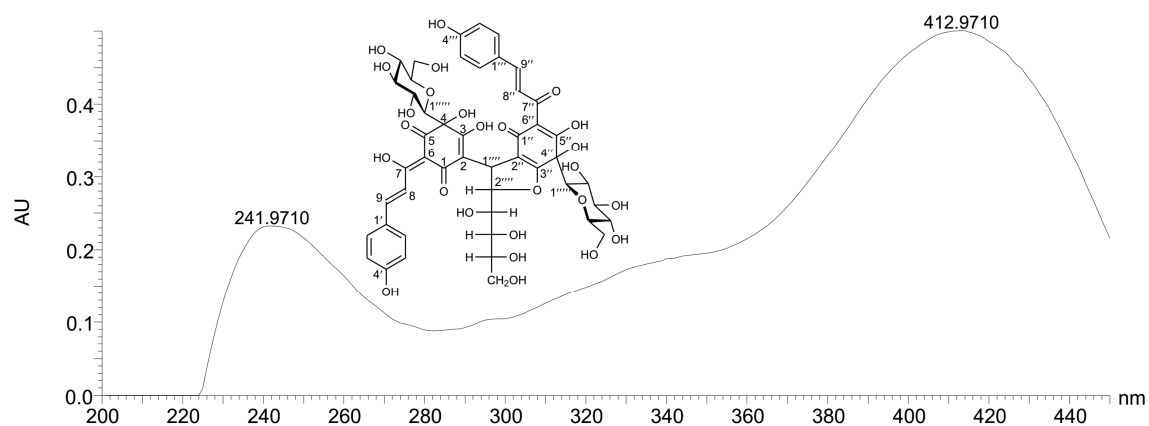

Figure S6. UV spectrum of ASYB.

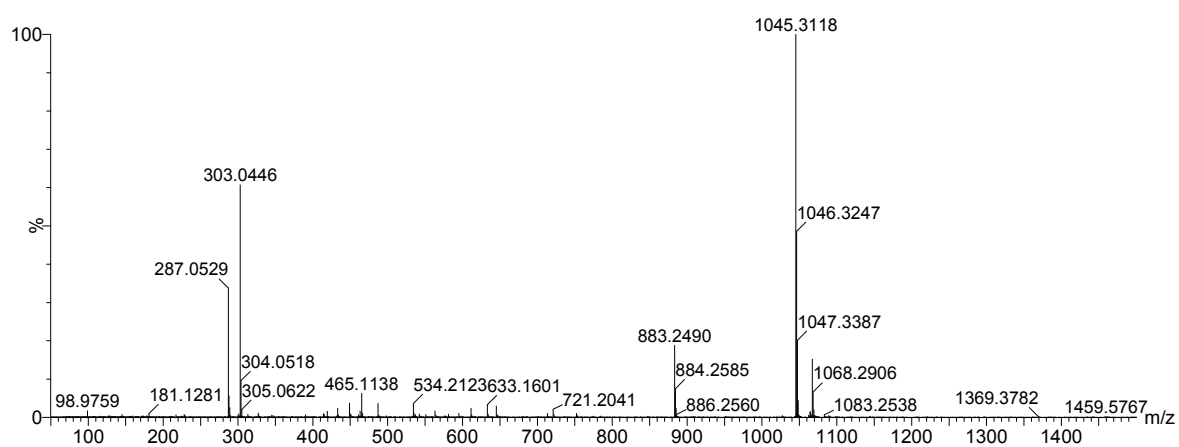

Figure S7. ESI+ spectrum of ASYB.

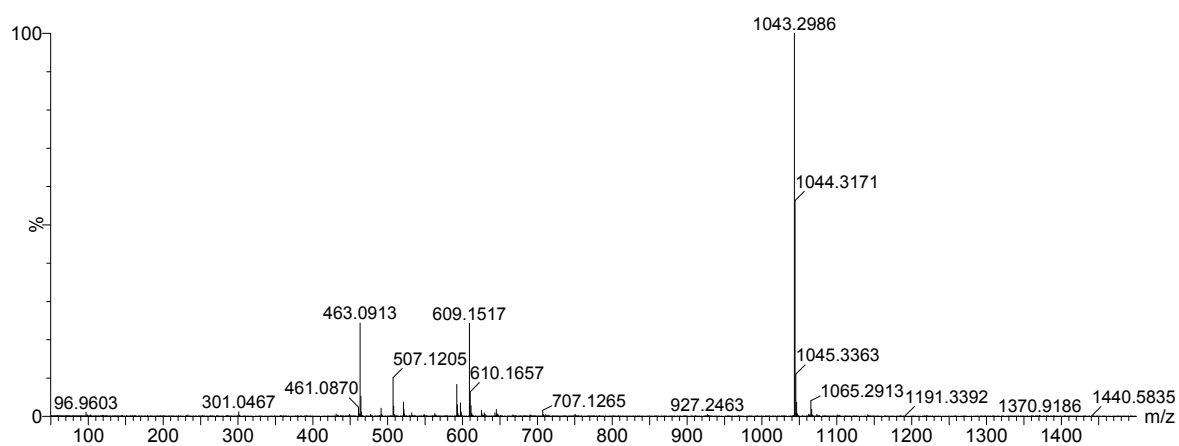

Figure S8. ESI- spectrum of ASYB.
